# Supplementary material
Source: PubMed Central journal article supplement (PMC7501191)

| Sway measure<br>(EO-firm) | Control  |              |       | pHD      |              |       | mHD      |              |       |
|---------------------------|----------|--------------|-------|----------|--------------|-------|----------|--------------|-------|
|                           | ICC(1-1) | 95%CI bounds |       | ICC(1-1) | 95%CI bounds |       | ICC(1-1) | 95%CI bounds |       |
|                           | $\rho$   | lower        | upper | $\rho$   | lower        | upper | $\rho$   | lower        | upper |
| <b>Jerk AP</b>            | 0.815*** | 0.587        | 0.940 | 0.887*** | 0.729        | 0.965 | 0.855*** | 0.664        | 0.954 |
| <b>Jerk ML</b>            | 0.473**  | 0.109        | 0.793 | 0.878*** | 0.710        | 0.962 | 0.764*** | 0.497        | 0.922 |
| <b>Total Sway Area</b>    | 0.705*** | 0.404        | 0.899 | 0.805*** | 0.569        | 0.938 | 0.879*** | 0.713        | 0.962 |
| <b>Total Power AP</b>     | 0.789*** | 0.540        | 0.931 | 0.644*** | 0.315        | 0.874 | 0.873*** | 0.700        | 0.960 |
| <b>Total Power ML</b>     | 0.501**  | 0.139        | 0.808 | 0.815*** | 0.586        | 0.940 | 0.815*** | 0.586        | 0.940 |

**Supplementary Table A:** Test-retest reliability of postural sway measures across groups  
Abbreviations: **pHD**: Premanifest Huntington's disease; **mHD**, Manifest Huntington's disease; **EO-firm**, Eyes open on firm surface; AP: Anteroposterior; ML: Mediolateral; \* :  $p < 0.05$ ; \*\* :  $p < 0.01$ ; \*\*\* :  $p < 0.001$ ;

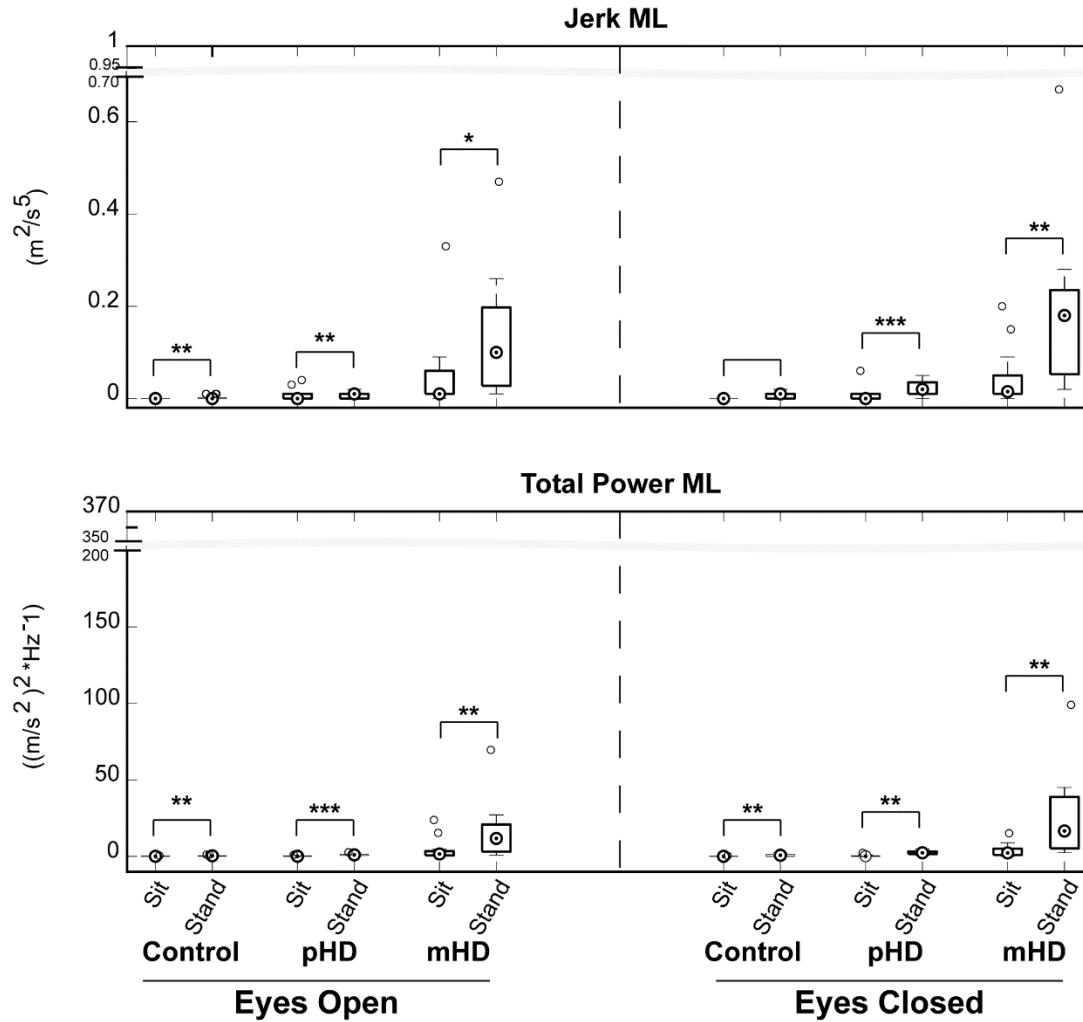

**Supplementary Figure B:** Modulation of postural control based on postural set in mediolateral direction

Abbreviations: **pHD**: Premanifest Huntington’s disease; **mHD**: Manifest Huntington’s disease; **ML**: Mediolateral; *p*-value: \*: <0.05; \*\*: <0.01; \*\*\*: <0.001

| Measure         | Condition  | Control        | pHD             | mHD              | Sig.    | MC      |
|-----------------|------------|----------------|-----------------|------------------|---------|---------|
| Jerk AP         | EO-firm    | 0.004 ± 0.003  | 0.013 ± 0.025   | 0.127 ± 0.119    | -       |         |
|                 | EC-firm    | 0.009 ± 0.003  | 0.025 ± 0.042   | 0.175 ± 0.157    | 0.128   |         |
|                 | EO-foam    | 0.008 ± 0.005  | 0.031 ± 0.052   | 0.207 ± 0.186    | 0.004   | b       |
|                 | EC-foam    | 0.030 ± 0.010  | 0.135 ± 0.196   | 0.537 ± 0.581    | < 0.001 | a, b    |
|                 | EO-sitting | 0.005 ± 0.007  | 0.011 ± 0.033*  | 0.128 ± 0.209    |         |         |
|                 | EC-sitting | 0.004 ± 0.006* | 0.010 ± 0.023*  | 0.141 ± 0.302    |         |         |
|                 | Gaze-firm  | 0.003 ± 0.001  | 0.012 ± 0.027   | 0.123 ± 0.102    |         |         |
|                 | Gaze-foam  | 0.005 ± 0.001  | 0.029 ± 0.050   | 0.146 ± 0.109    |         |         |
| Jerk ML         | EO-firm    | 0.005 ± 0.002  | 0.014 ± 0.021   | 0.136 ± 0.139    | -       |         |
|                 | EC-firm    | 0.009 ± 0.004  | 0.025 ± 0.022   | 0.190 ± 0.186    | 0.097   |         |
|                 | EO-foam    | 0.014 ± 0.005  | 0.034 ± 0.031   | 0.282 ± 0.287    | < 0.001 | b, c    |
|                 | EC-foam    | 0.059 ± 0.026  | 0.157 ± 0.113   | 0.587 ± 0.342    | < 0.001 | a, b, c |
|                 | EO-sitting | 0.001 ± 0.001* | 0.005 ± 0.010*  | 0.059 ± 0.101*   |         |         |
|                 | EC-sitting | 0.001 ± 0.001* | 0.007 ± 0.015*  | 0.047 ± 0.071*   |         |         |
|                 | Gaze-firm  | 0.003 ± 0.001  | 0.010 ± 0.015*  | 0.126 ± 0.116    |         |         |
|                 | Gaze-foam  | 0.008 ± 0.004* | 0.028 ± 0.033*  | 0.178 ± 0.115    |         |         |
| Total Sway Area | EO-firm    | 0.004 ± 0.002  | 0.008 ± 0.009   | 0.087 ± 0.096    | -       |         |
|                 | EC-firm    | 0.007 ± 0.003  | 0.016 ± 0.013   | 0.121 ± 0.118    | 0.119   |         |
|                 | EO-foam    | 0.009 ± 0.003  | 0.020 ± 0.019   | 0.144 ± 0.122    | < 0.001 | b, c    |
|                 | EC-foam    | 0.033 ± 0.011  | 0.085 ± 0.074   | 0.324 ± 0.221    | < 0.001 | a, b, c |
|                 | EO-sitting | 0.002 ± 0.003* | 0.004 ± 0.008*  | 0.059 ± 0.105    |         |         |
|                 | EC-sitting | 0.002 ± 0.002* | 0.003 ± 0.005*  | 0.049 ± 0.093    |         |         |
|                 | Gaze-firm  | 0.003 ± 0.001  | 0.006 ± 0.009*  | 0.075 ± 0.063    |         |         |
|                 | Gaze-foam  | 0.005 ± 0.001* | 0.017 ± 0.016   | 0.099 ± 0.070    |         |         |
| Total Power AP  | EO-firm    | 1.129 ± 0.935  | 1.978 ± 1.897   | 30.817 ± 39.406  | -       |         |
|                 | EC-firm    | 2.149 ± 0.915  | 3.873 ± 3.101   | 33.646 ± 32.757  | 0.154   |         |
|                 | EO-foam    | 1.784 ± 1.028  | 4.504 ± 5.596   | 42.712 ± 50.513  | 0.003   | b, c    |
|                 | EC-foam    | 7.307 ± 3.874  | 19.053 ± 21.059 | 86.574 ± 76.378  | < 0.001 | b       |
|                 | EO-sitting | 2.499 ± 5.801  | 2.187 ± 6.142*  | 31.624 ± 59.341  |         |         |
|                 | EC-sitting | 1.955 ± 4.532  | 1.772 ± 4.270*  | 44.362 ± 111.690 |         |         |
|                 | Gaze-firm  | 0.757 ± 0.498  | 1.770 ± 2.193   | 22.243 ± 21.339  |         |         |
|                 | Gaze-foam  | 1.176 ± 1.080  | 3.432 ± 3.869   | 30.070 ± 25.312  |         |         |
| Total Power ML  | EO-firm    | 0.552 ± 0.315  | 1.362 ± 1.125   | 15.992 ± 19.805  | -       |         |
|                 | EC-firm    | 1.189 ± 0.554  | 2.873 ± 1.729   | 25.325 ± 28.658  | 0.004   | b       |
|                 | EO-foam    | 2.298 ± 1.503  | 4.766 ± 3.534   | 29.863 ± 26.073  | 0.003   | b       |
|                 | EC-foam    | 11.379 ± 4.809 | 24.167 ± 16.858 | 75.694 ± 40.627  | < 0.001 | b, c    |
|                 | EO-sitting | 0.119 ± 0.152* | 0.293 ± 0.493*  | 5.028 ± 8.036*   |         |         |
|                 | EC-sitting | 0.092 ± 0.114* | 0.285 ± 0.577*  | 3.483 ± 4.813*   |         |         |
|                 | Gaze-firm  | 0.299 ± 0.119* | 0.841 ± 0.938*  | 12.347 ± 12.490  |         |         |
|                 | Gaze-foam  | 1.090 ± 0.782* | 3.185 ± 2.428*  | 20.364 ± 18.354  |         |         |

**Supplementary Table C:** Postural sway values across sensory conditions and postural sets  
Abbreviations: **pHD**: Premanifest Huntington's disease **mHD**: Manifest Huntington's disease; **AP**: Anteroposterior; **ML**, Mediolateral; **MC**, Multiple comparisons; **a**: significant difference between Control vs pHD ( $p < 0.05$ ); **b**: significant difference between Control vs mHD ( $p < 0.05$ ); **c**: significant difference between pHD vs mHD ( $p < 0.05$ ); \*:Significant difference between Sit vs Stand ( $p < 0.05$ ); or Gaze vs EO ( $p < 0.05$ )

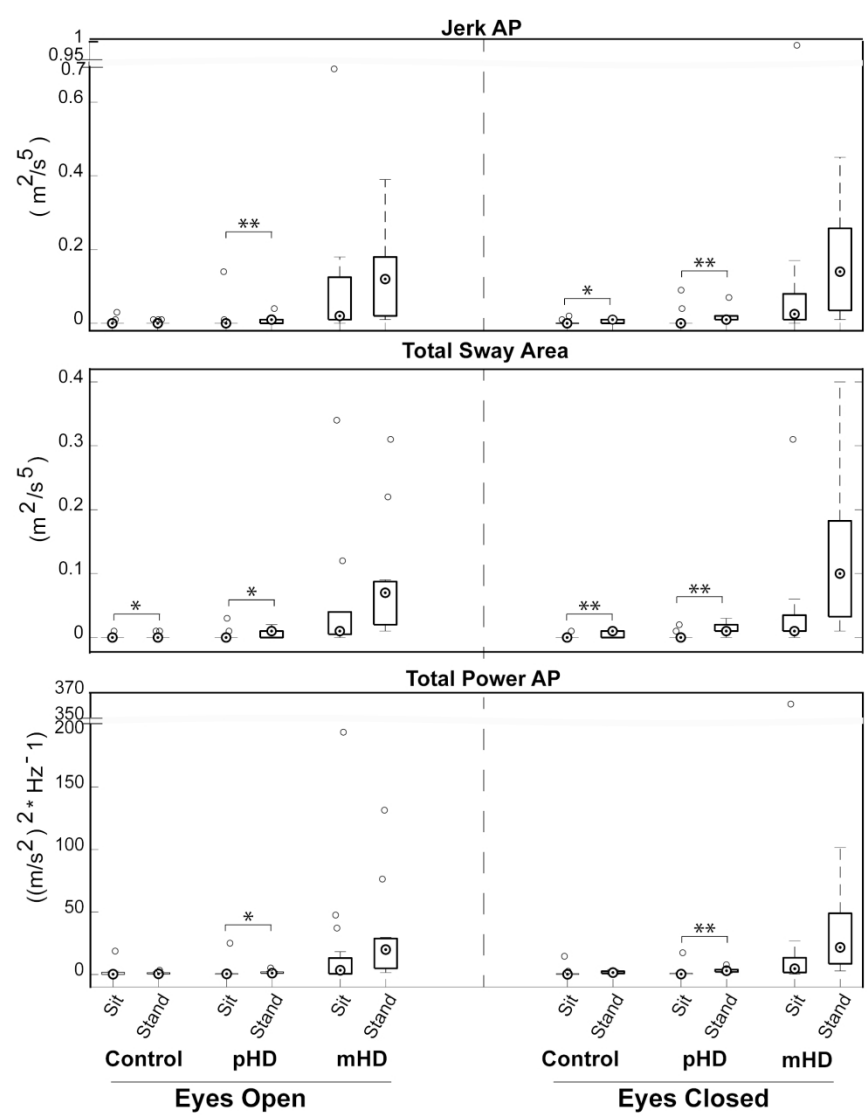

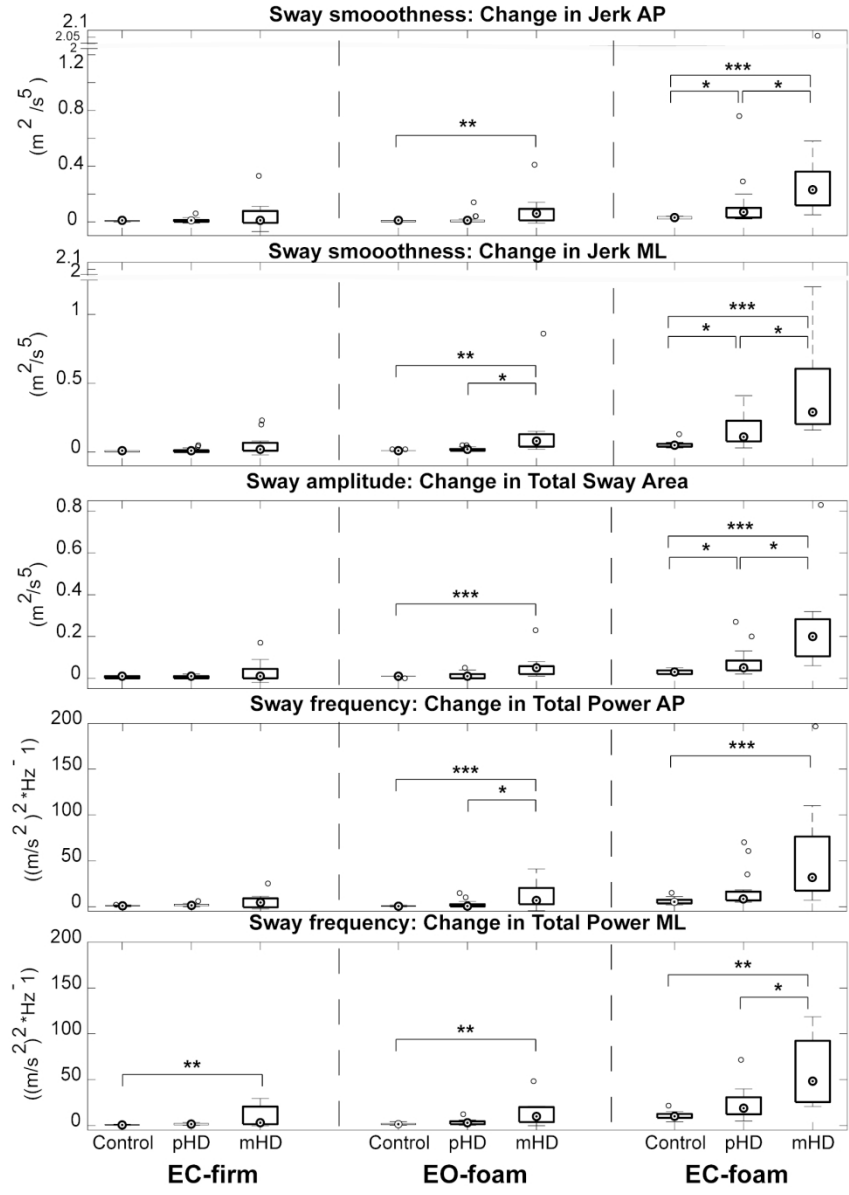

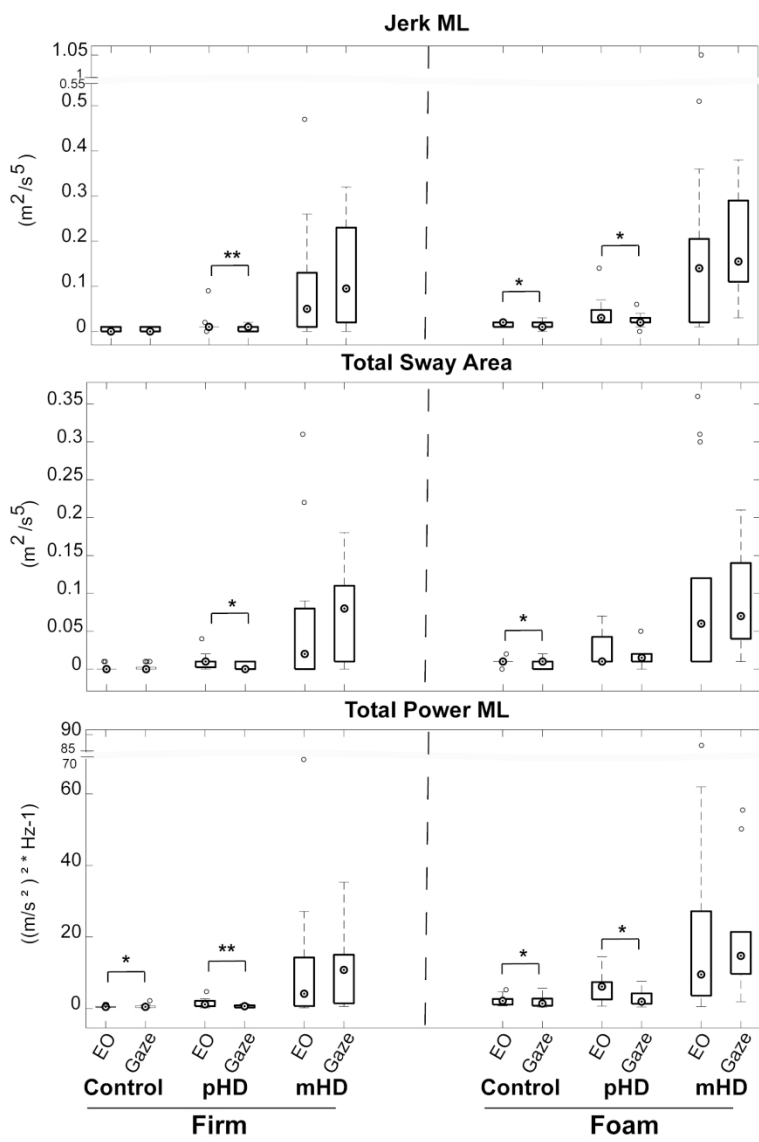

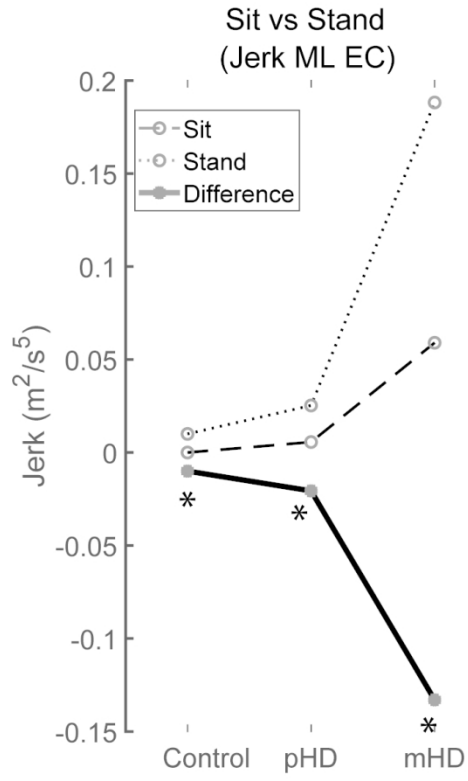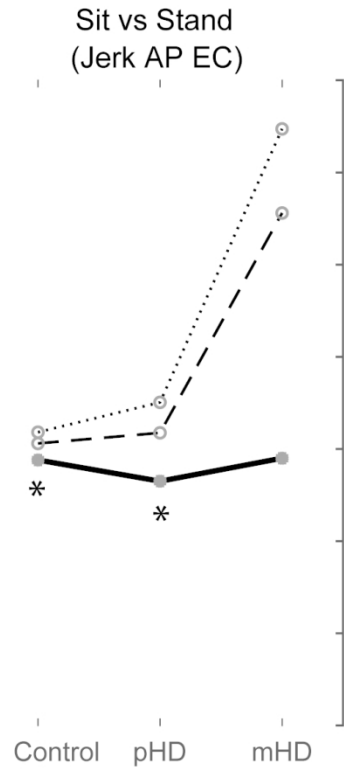

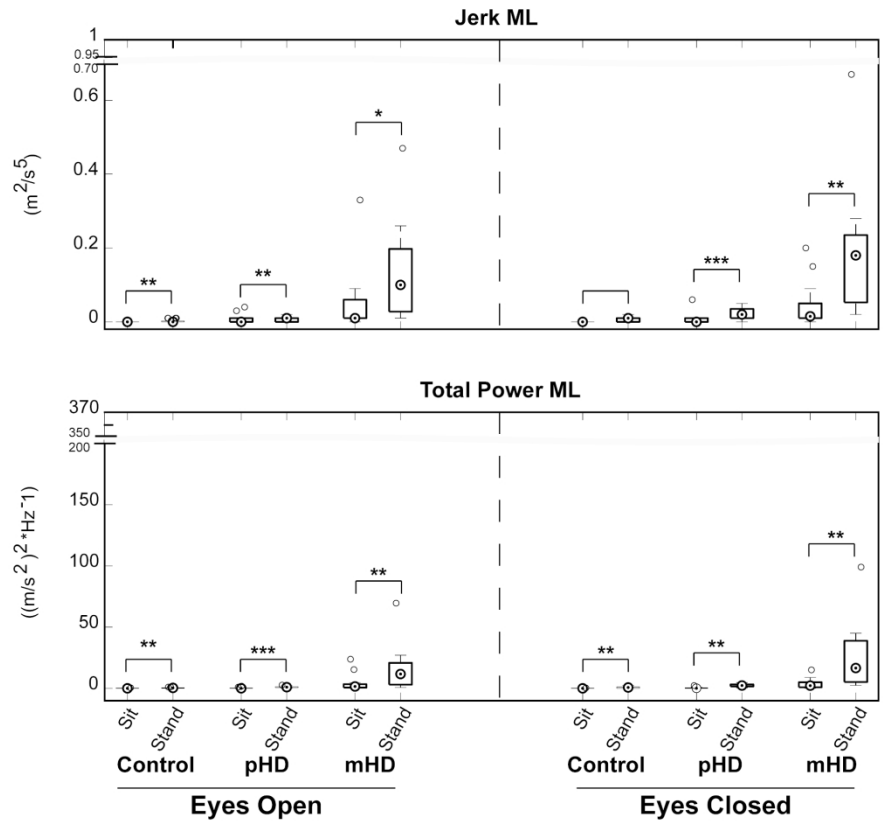

Supplement: NIHMS1604333-supplement-1.pdf [file NIHMS1604333-supplement-1.pdf]
